# Supplementary material for: Perfluoroaryl boryl complexes: synthesis, spectroscopic and structural characterisation of a complex containing the bis(pentafluorophenyl)boryl ligand
Source: Royal Society of Chemistry journal article supplement (doi:10.1039/b106881b), 2001-01-01
Supplement: b106881b.doc [file b106881b.doc]

**Perfluoroaryl boryl complexes: synthesis, spectroscopic and structural characterisation of a complex containing the *bis*(pentafluorophenyl)boryl ligand.**

S. Aldridge,**a* A. Al-Fawaz,*a* R.J. Calder,*a* A.A. Dickinson,*a* D.J. Willock,*a* M.E. Light,*b* and M.B. Hursthouse.*b*

*a* Department of Chemistry, Cardiff University, PO Box 912, Park Place, Cardiff, UK CF10 3TB.

*b* EPSRC National Crystallography Service, Department of Chemistry, University of Southampton, Highfield, Southampton, UK SO17 1BJ.

# Supplementary Data

**A.** **Computational methodology**

The computational methodology used in the calculation of geometric and bonding parameters for compounds **2**, **3** and **4** is detailed below and is very similar to that used in reference 7.

Gradient corrected DFT calculations were carried out using the ADF2000.01 code [E.J. Baerends, D.E. Ellis and P. Ros, *Chem. Phys.*, 1973, **2**, 41; L. Versluis and T. Ziegler, *J. Chem. Phys.*, 1988, **88**, 322; G. te Velde and E.J. Baerends, *J Comput. Phys.* 1992, **99**, 84; C. Fonseca Guerra, J.G. Snijders, G. te Velde, and E.J. Baerends, *Theor. Chem. Acc.* 1998, **99**, 391], with functionals for exchange and correlation due to Becke [A. D. Becke, *Phys. Rev.* *A*, 1988, **38**, 3098] and Lee, Yang and Parr [C. Lee, W. Yang and R.G. Parr, *Phys. Rev. B,* 1988, **37**, 785], respectively. A basis set constructed from Slater type orbitals at the triple zeta with polarization functions level was used for all calculations (ADF IV). The level of frozen core approximation for B, C, O and F was the 1s orbital and for Fe was the 2p orbital. All structures were fully optimised with no symmetry restrictions. Convergence was accepted when the following limits were met: (i) energy change on next step < 1x10-3 Ha; (ii) gradient < 1x10-3 Ha Å-1; and (iii) uncertainty in cartesian coordinates < 1x10-2 Å. The multiplicity of each structure was determined by using unrestricted calculations with spin states set to reasonable alternatives to determine the lowest energy configuration which conformed to the aufbau principle.

The bond dissociation energy for given MB bonds was calculated by estimating the energy change associated with the homolytic bond cleavage reaction:

(5-C5H5)Fe(CO)2(BX2)  (5-C5H5)Fe(CO)2 + BX2

The structures of the products from this reaction were independently optimised to allow for the inclusion of any molecular relaxation. The effect of basis set superposition error (BSSE) on the bond dissociation energy for compound **3** was calculated using the counterpoise method to be of the order of 7.5 kJ mol-1, a value comparable to that found for metal-carbonyl and metal-metal bonds using similar basis sets (6-8 kJ mol-1) [A. Rosa, A.W. Ehlers, E.J. Baerends, J.G. Snijders and G.; te Velde, *J. Phys. Chem*., 1996, **100**, 5690]. The small magnitude of the BSSE suggests that the basis set being used is of high quality, in agreement with conclusions based on FeB bond length as a function of basis set [A.A. Dickinson, D.J. Willock, R.J. Calder and S. Aldridge, submitted for publication to *Organometallics*].

To calculate the degree of  and -bonding between the metal centre and boron atom the optimised structures were re-orientated so that the bond was aligned with the *z*-axis. A bonding analysis was then carried out following the approach outlined below to give contributions to the bonding density segregated according to the symmetry of the atomic orbitals involved.

The one electron wavefunctions, , used to represent the density in these DFT calculations are constructed in the usual manner as a linear combination of atomic basis functions, :

(1)

where is the coefficient of the *kth* basis function in the *ith* molecular orbital and there are a total of *M* basis functions. The density, **, is then given by summation over the occupied orbitals of the one electron densities:

(2)

Where *N* is the total number of electrons and we only consider the restricted spin paired situation for simplicity, extension to the spin unrestricted case is straightforward. The rearranged form of the density expression allows the calculation to be performed *via* the definition of two square matrices with the dimension *M*. The first is usually referred to as the density matrix, **P**, and its components depend only on the calculated coefficients:

(3)

The second, the overlap matrix, **S**, depends on the basis set and the geometry of the molecule:

(4)

The density can then be represented as a matrix multiplication:

(5)

Since the basis set consists of atom centred functions, **P** and **S** will contain some contributions which are wholly centred on a given atom and some which are due to the overlap of basis functions on pairs of atoms. The latter contribution is related to the bonding between atoms and the most straightforward way to address the character of bonding is to examine this portion in isolation. By identifying the basis functions centred on a pair of atoms, *A* and *B* say, we can identify the bonding density, *AB*, by summing only the relevant contributions in equation 5:

(6)

This is the bonding density as defined by Mulliken [R.S. Mulliken, *J.Chem.Phys.,* 1955, **23**, 1833]. To differentiate  and  contributions to the bonding density we simply align the bond of interest with the *z*-direction and separate the basis functions according to their symmetry, *e.g.* *pz* is of ** type and *px* and *py* are of  type. Equation 6 can then be further sub-divided:

(7)

where the symmetry labels on the summations indicate the basis function symmetry to be considered. We report the two terms in equation 7 separately to judge the degree of  bonding in MB bonds.

This decomposition of the molecular orbital representation of the density to give bonding density is not unique and so to ensure the reliability of our analysis we also consider a bonding density analysis proposed by Mayer [I. Mayer, *Int. J.Quantum Chem.,* 1986, **29**, 477]. In the Mayer analysis the product of the density and overlap matrices is first calculated and then the elements of this product matrix are selected according to the basis functions belonging to the atoms of interest. Again we further partition the matrix in terms of  and σ symmetry:

(8)

As part of this work the application of equation (7) and (8) to the data provided by an ADF output was automated by the development of a dedicated program. The coding was tested by calculation of the Mulliken atomic densities which are output by ADF and by analysis of simple test cases such as ethane, ethene, ethyne *etc.* (these analyses are included in the below). The Mayer bond order calculation was tested by comparing values obtained from our analysis of ADF outputs and those generated at a similar basis set level by the MSI code, Dmol [*DMOL3*, Biosym/MSI, San Diego, CA, 1996]. The results of decomposition into  and  contributions from Mulliken and Mayer approaches consistently showed the same trends and so only the former is reported in the main text.

**B. Bond orders and  and  contributions to the bonding density for test molecules ethane, ethene, ethyne, carbon monoxide and dinitrogen**

| Compound | Basis set*a* | Mayer bond order | % sigma | % pi |
| --- | --- | --- | --- | --- |
| C2H6 | I | 1.024 | 93.31 | 0.69 |
|  | IV | 0.856 | 96.11 | 3.86 |
| C2H4 | I | 2.032 | 55.94 | 44.06 |
|  | IV | 1.858 | 53.71 | 46.29 |
| C2H2 | I | 3.006 | 49.38 | 50.62 |
|  | IV | 2.719 | 37.51 | 62.49 |
| CO | IV | 2.317 | 14.69 | 85.31 |
| N2 | IV | 2.926 | 25.43 | 74.57 |

*a*Basis sets:

ADF IV basis set is constructed from Slater type orbitals with triple zeta valence shell and a single polarization function per atom. ADF I: minimal basis set at the single zeta level without polarization functions.

C. Calculated (in italics) and crystallographically determined structural parameters for iron boryl complexes 2, 3 and 4.

|  | Distance (Å)*a* | | | |  | Angle (o) | | |
| --- | --- | --- | --- | --- | --- | --- | --- | --- |
|  | Fe-B | Fe-Cp centroid | Mean  Fe-CO | Mean  B-X |  | OC-Fe-CO | X-B-X |  |
| **2***b* | 1.965(5) | 1.734(4) | 1.755(4) | 1.596(5) |  | 94.5(2) | 111.5(3) | 28.2(3) |
|  | *2.006* | *1.823* | *1.776* | *1.597* |  | *93.3* | *114.0* | *40.5* |
| **3** | 1.959(6) | 1.716(1) | 1.731(6) | 1.411(7) |  | 92.9(3) | 108.0(5) | 7.9 |
|  | *2.009* | *1.809* | *1.765* | *1.420* |  | *94.6* | *109.4* | *1.4* |
| **4** | 2.034(3) | 1.729(1) | 1.748(3) | 1.577(3) |  | 90.8(1) | 116.6(2) | 75 |
|  | *2.107* | *1.824* | *1.762* | *1.582* |  | *89.0* | *118.2* | *66.8* |

*a* The calculated distances involving the heavier iron atom for all complexes reported here and in the much larger study reported in reference 7 [A.A. Dickinson, D.J. Willock, R.J. Calder and S. Aldridge, submitted for publication to *Organometallics* - copies of which have been included] are typically 2-3% greater than those obtained crystallographically; such an over-estimate in bond lengths involving heavier atoms by DFT is well precedented [E.A. McCullough Jr., E. Aprà and J. Nichols, *J. Phys. Chem. A,* 1997, **101**, 2502]. Frenking *et al*., for example, in their recent study of osmium boryl complexes found a similar over-estimation of OsB distances [*e.g.* 2.046 Å (exp.) vs 2.104 Å (calc.) for the five-coordinate species (R3P)2OsCl(CO)B(OH)2], a discrepancy which has been attributed to solid-state effects which leads to the shortening of donor-acceptor bonds [K.T. Giju, M. Bickelhaupt, and G. Frenking, *Inorg. Chem*., 2000, **39**, 4776]. Interestingly, however, the differences between observed and calculated FeB distances are reasonably constant, therefore demonstrating that the DFT method reproduces well observed *trends* in this parameter. The influence of level of theory and basis set size on the FeB bond length have been investigated in detail (reference 7) as has the effect of variation in FeB distance on the  and  symmetry covalent contribution to the bond. *b* Crystallographically determined values for **2** are the mean values for the two independent molecules within the asymmetric unit.

D. Calculated (in italics) and crystallographically determined structural parameters and experimentally determined CO stretching frequencies for the iron boryl complexes I [(5-C5H5)Fe(CO)2Bcat], II [(5-C5H5)Fe(CO)2BO2C2H2], III [(5-C5Me5)Fe(CO)2Bcat], IV [(5-C5H5)Fe(CO)2BO2C6H2O2BFe(CO)2Cp], V [(5-C5H5)Fe(CO)2BPh2], VI [(5-C5H5)Fe(CO)2B(Cl)NMe2] and VII [(5-C5Me4Et)Fe(CO)2BH2.PMe3] (taken from reference 7).

|  | Distance (Å) | | | |  | Angle (o) | | | (CO) |
| --- | --- | --- | --- | --- | --- | --- | --- | --- | --- |
|  | Fe-B | Fe-Cp centroid | Mean  Fe-L | Mean  B-X |  | L-Fe-L | X-B-X | *a* | (expt., cm-1) |
| **I** | 1.959(6) | 1.716(1) | 1.731(6) | 1.411(7) |  | 92.9(3) | 108.0(5) | 7.9 | 2024 |
|  | *2.009* | *1.809* | *1.765* | *1.420* |  | *94.6* | *109.4* | *1.4* | 1971 |
| **II** | - | - | - | - |  | - |  | - | - |
|  | *2.002* | *1.772* | *1.767* | *1.414* |  | *94.6* | *108.3* | *2.7* |  |
| **III** | 1.980(2) | 1.72(1) | 1.746(3) | 1.407(3) |  | 96.3(1) | 108.8(2) | 26.7 | 1996 |
|  | *2.027* | *1.802* | *1.767* | *1.420* |  | *95.3* | 107.6 | *28.1* | 1940 |
| **IV** | 1.971(2) | 1.721(2) | 1.755(2) | 1.406(2) |  | 94.0(8) | 109.2(1) | 82.2(1) | 2006 |
|  | *2.015* | *1.804* | *1.773* | *1.415* |  | *94.2* | *109.7* | *83.4* | 1954 |
| **V** | 2.034(3) | 1.729(1) | 1.748(3) | 1.577(3) |  | 90.8(1) | 116.6(2) | 75 | 2021 |
|  | *2.107* | *1.824* | *1.762* | *1.582* |  | *89.0* | *118.2* | *66.8* | 1951 |
| **VI***b* | 2.027(5) | 1.735(1) | 1.746 | 1.377(6) N  1.834(5) Cl | | 93.6 | 112.0(3) | 87.4 | 2006 |
|  | *2.058* | *1.823* | *1.763* | *1.409 N*  *1.855 Cl* | | *94.3* | *111.7* | *75.2* | 1946 |
| **VII***c* | 2.195(14) | *d* | *d* | 1.924(15) P | | *d* | *d* | *e* | 1932 |
|  | *2.215* | *1.820* | *1.758* | *1.211 H*  *1.971 P* |  | *94.7* | 114.7 | *e* | 1869 |

*a*  is defined as the torsion angle between the (5-C5R5) centroid-Fe-B and BX2 planes. *b* Calculations employed the simplification of using the B(Cl)NH2 ligand, rather than B(Cl)NMe2. *c* Calculations employed the simplified ligands PH3 and C5Me5 rather than PMe3 and C5Me4Et. *d* Data not available. *e* Not applicable.
